# Supplementary material for: Exploring the sequence–structure relationship for amyloid peptides
Source: PubMed Central journal article supplement — Biochem J. 2013 Feb 15;450(Pt 2):275–83. doi: 10.1042/BJ20121773 (PMC3573774; doi:10.1042/bj20121773), 2013-02-15
Supplement: bj4500275add.pdf [file bj4500275add.pdf]

## SUPPLEMENTARY ONLINE DATA

## Exploring the sequence–structure relationship for amyloid peptides

Kyle L. MORRIS\*, Alison RODGER†, Matthew R. HICKS‡, Maya DEBULPAEP§, Joost SCHYMKOWITZ||, Frederic ROUSSEAU|| and Louise C. SERPELL\*

\*School of Life Sciences, University of Sussex, Falmer, East Sussex BN1 9QG, U.K., †Department of Chemistry, University of Warwick, Coventry CV4 7AL, U.K., ‡School of Biosciences, University of Birmingham, Birmingham B15 2TT, U.K., §VIB Switch Laboratory, Free University of Brussels, Pleinlaan 2, Brussels 1050, Belgium, and ||VIB Switch Laboratory, Department of Cellular and Molecular Medicine, University of Leuven, Leuven 3000, Belgium

## HYFNIF

On the basis of the dimensions of a  $\beta$ -strand monomer of HYFNIF, the available packing arrangements within the determined unit cell (Table S4) are limited and not described by the steric zipper classes. The indexed unit cell may only contain two peptides end on end to satisfy the  $\beta$ -sheet spacing (on the basis of equatorial signal measurement) and appropriately accommodate the length of the peptide. A low-resolution reflection at  $\sim 40$  Å (Table S3) indicates a longer-range repeat, that we hypothesize arises from a protofilament width. The repeating cell of HYFNIF is well described as two  $\beta$ -strands end on end. Model building explored the possibility of the two  $\beta$ -sheets being related by a displacement along the fibre axis, a rotational symmetry or translation symmetry.

## RVFNIM

Two monomers of RVFNIM may be accommodated within the determined unit cell (Table S4). The  $a$  dimension

corresponds approximately to the peptide length and the  $b$  dimension approximately to double the sheet spacing distance of 10.8 Å. In this respect, this systems arrangement was sufficiently explored by the use of the amyloidogenic class models [6].

## VIYKI

Four monomers of VIYKI may be arranged within the repeating cell (Table S4). The  $a$  dimension corresponds to approximately two peptide  $\beta$ -stands of VIYKI and when considering the  $\beta$ -sheet spacing of 9.21 Å, the  $b$  dimension can accommodate approximately two  $\beta$ -sheets. This creates a large cell that contains four VIYKI monomers. We consider that this is akin to two amyloid class models side by side and so modelling was based on searching the structure space based on a cell containing two  $\beta$ -strands. The  $a$  dimension may again correspond to a protofilament width and arise from lateral packing of protofilaments.

<sup>1</sup> To whom correspondence should be addressed (email l.c.serpell@sussex.ac.uk).



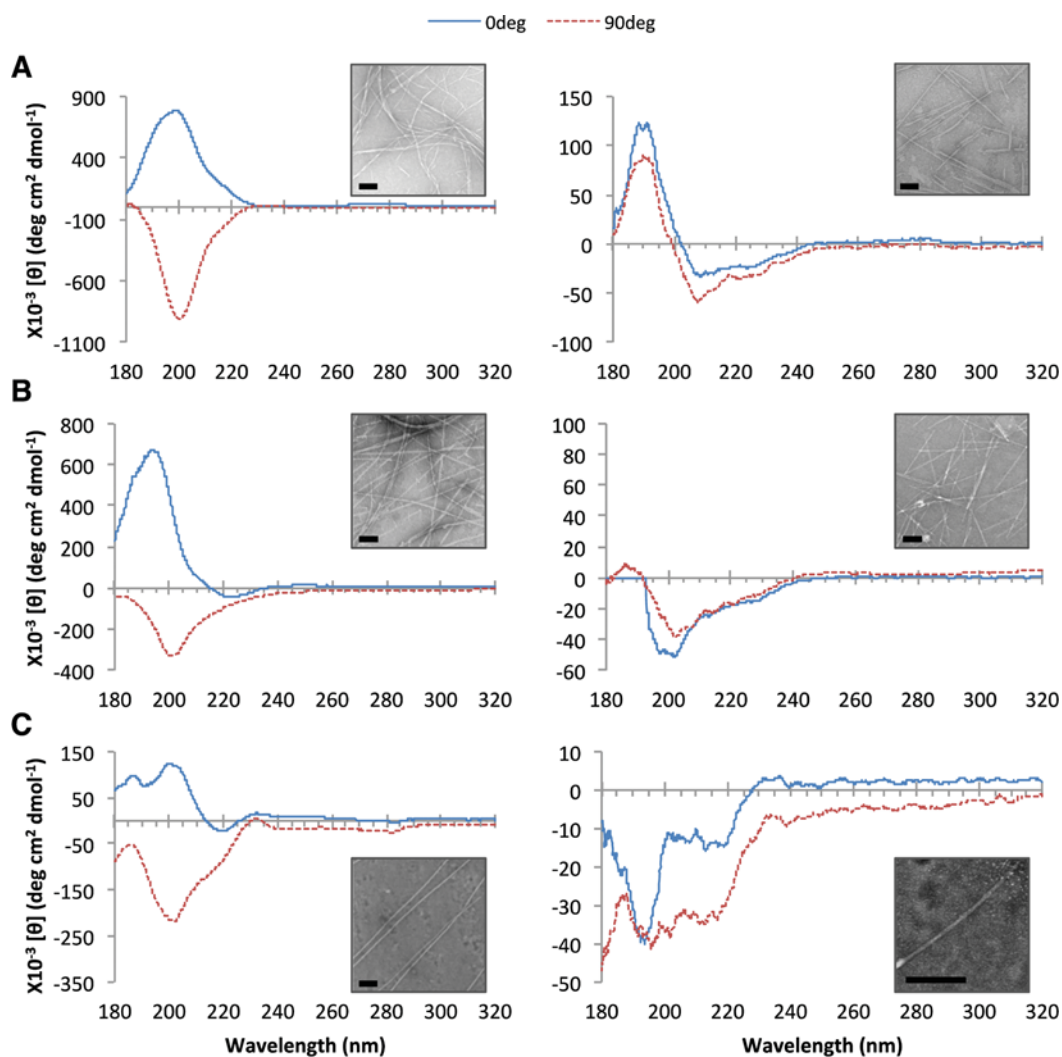

**Figure S3 CD spectra for the Waltz peptides pre- and post-sonication**

(A) HYFNIF, (B) RVFNIM and (C) VIYKI pre- (left-hand panel) and post- (right-hand panel) bath sonication. The legend indicates sample orientation in the instrument. TEM of the samples are shown as insets; scale bars, 100 nm. LD artefacts are observed in the samples pre-sonication as indicated by sample orientation signal dependence. The true CD signals reveal  $\beta$ -sheet secondary structure with additional contributions from phenylalanine and tyrosine at  $\sim 210$  nm and  $\sim 230$  nm respectively, due to the high aromatic content of the Waltz peptides (17–33%). See Table S1 and Figure 2 of the main text.

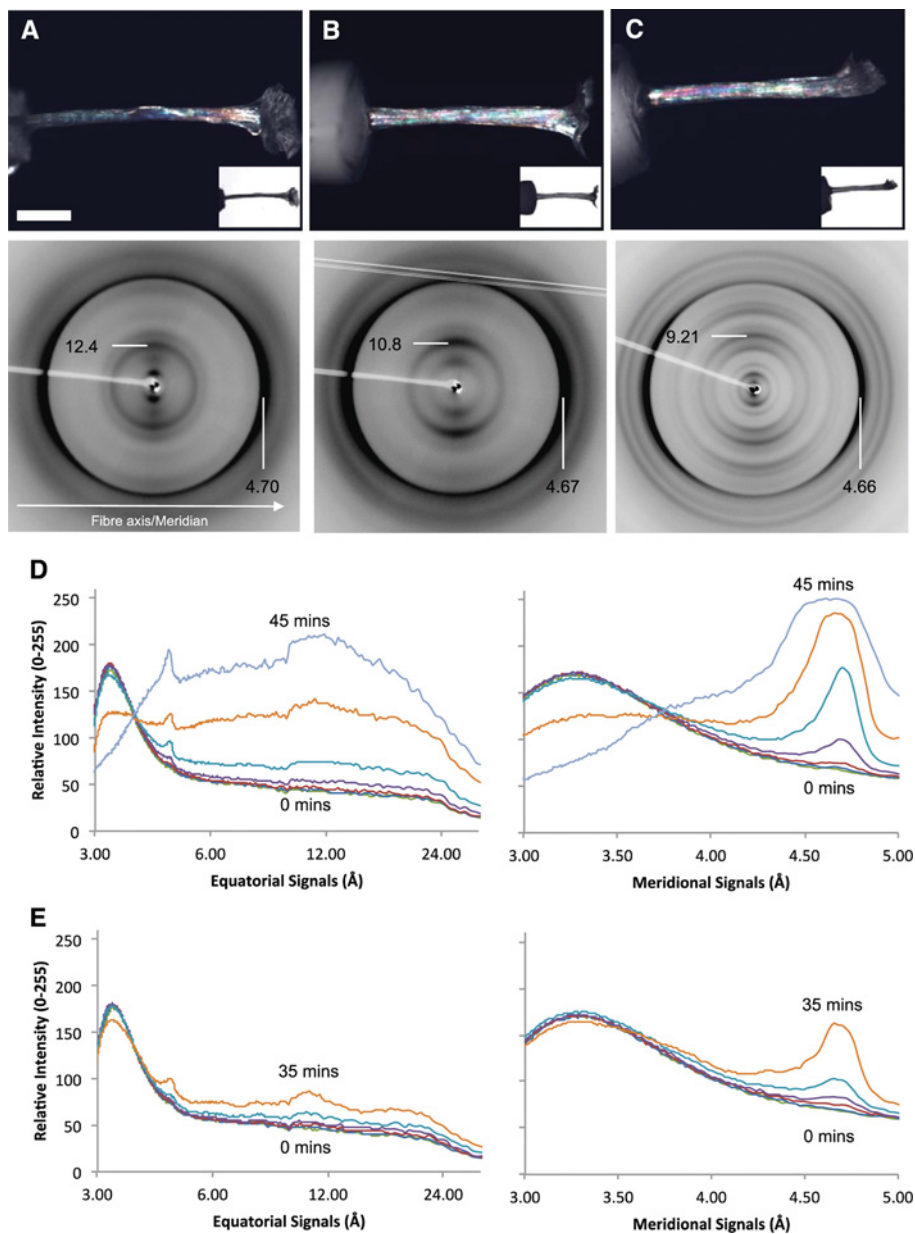

**Figure S4 Typical alignments, fibrous and real-time XRFD of the Waltz peptides**

(A) HYFNIF, (B) RVFNIM and (C) VIYKI as visualized by cross-polarized microscopy. The insets show the alignments under normal light microscopy. Scale bar, 500 μm. XRFD from the corresponding alignments is shown with major meridional (vertical lines) and equatorial (horizontal lines) reflections labelled in Å. Data were collected at Diamond I24. Real-time XRFD from (D) HYFNIF and (E) RVFNIM is shown graphically. In both cases the equatorial and meridional signals characteristic of the amyloid structure are observed, and the diffuse diffraction signal at ~3 Å indicates the alignment is still hydrated. Equatorial signals are shown over a logarithmic scale for clarity. See Figure 4 in the main text.

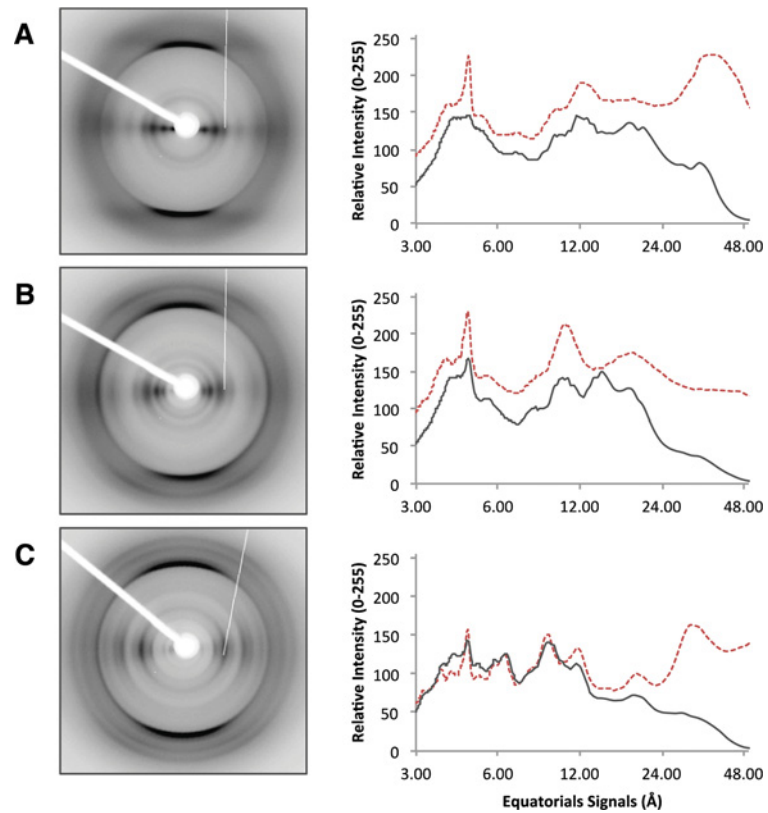

**Figure S5 XRD exhibited from different textured alignments of the Waltz peptides**

(A) HYFNIF, (B) RVFNIM and (C) VIYKI in a film-texture. Graphical traces of the equators are shown for comparison of (black line) film-textured to (red dotted line) fibrous-textured alignments. These indicate the same structure is reported with some additional information in the case of RVFNIM, which is later used for comparison with simulation data. Patterns are aligned with equivalent fibre axes vertical and equatorial signals are shown over a logarithmic scale for clarity. See Figure 6 of the main text.

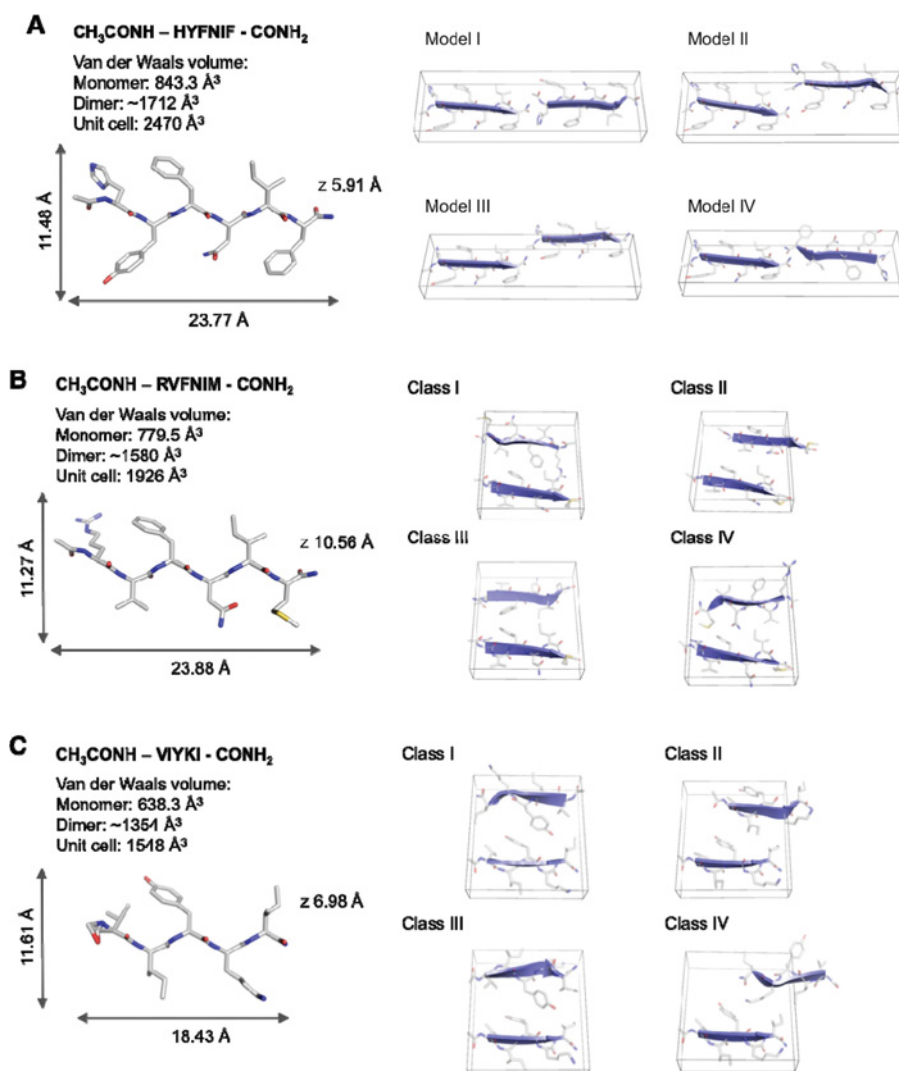

**Figure S6** Four structural classes constructed for the three Waltz peptides

(A) HYFNIF, (B) RVFNIM and (C) VIYKI. See Figure 5 of the main text.

**Table S1 Dichroic analysis of the CD spectra recorded for the Waltz peptides post-sonication, highlighting the predominant secondary structural elements**

Analysis was performed over two data sets using the CDSSTR analysis program [1] and SP175 190–240 nm reference set [2]. NRMSD, normalized root-mean-square deviation.

| Secondary structure | HYFNIF |      | RVFNIM |      | VIYKI |      |
|---------------------|--------|------|--------|------|-------|------|
|                     | %      | ±    | %      | ±    | %     | ±    |
| Helix               | 6.0    | 1.4  | 4.5    | 2.1  | 2.0   | 0.0  |
| Strand              | 42.5   | 3.5  | 40.0   | 5.7  | 42.5  | 0.7  |
| Turn                | 11.5   | 0.7  | 12.5   | 2.1  | 12.0  | 0.0  |
| Other               | 40.0   | 1.4  | 42.5   | 0.7  | 41.5  | 0.7  |
| Total               | 100.0  | 7.1  | 99.5   | 10.6 | 98.0  | 1.4  |
| NRMSD               | 0.03   | 0.01 | 0.05   | 0.00 | 0.04  | 0.01 |

**Table S2 LD peaks exhibited by the Waltz fibrils when under shear and Couette flow alignment**

LD and LD<sub>red</sub> values are reported in  $\Delta\text{Abs} \times 10^4$  after background subtraction and zeroing. Abs<sub>iso</sub> are reported as the isotropic absorbance from the sample after background Abs<sub>iso</sub> subtraction. Shear aligned fibrils are perpendicular to the orientation axis ( $\perp$ ), whereas flow aligned fibrils are parallel with the orientation axis ( $\parallel$ ).

|               | HYFNIF |        |                    |                   | RVFNIM |        |                    |                   | VIYKI |        |                    |                   |
|---------------|--------|--------|--------------------|-------------------|--------|--------|--------------------|-------------------|-------|--------|--------------------|-------------------|
|               | nm     | LD     | Abs <sub>iso</sub> | LD <sub>red</sub> | nm     | LD     | Abs <sub>iso</sub> | LD <sub>red</sub> | nm    | LD     | Abs <sub>iso</sub> | LD <sub>red</sub> |
| Shear aligned | 283.4  | −3.862 | 0.003              | −1492             | –      | –      | –                  | –                 | 283.0 | −8.174 | 0.017              | −492.3            |
|               | 278.0  | −4.278 | 0.004              | −1033             | –      | –      | –                  | –                 | 276.0 | −7.777 | 0.020              | −382.2            |
|               | 234.0  | 1.881  | 0.027              | 69.63             | –      | –      | –                  | –                 | 231.2 | 12.16  | 0.083              | 146.5             |
|               | 200.0  | −198.4 | 0.490              | −404.8            | 196.4  | −268.7 | 0.429              | −626.7            | 200.4 | −200.1 | 0.628              | −318.7            |
| Flow aligned  | 282.6  | 18.68  | 0.004              | 4861              | –      | –      | –                  | –                 | 283.0 | 4.655  | 0.011              | 429.1             |
|               | 277.2  | 19.61  | 0.005              | 3794              | –      | –      | –                  | –                 | 276.0 | 3.878  | 0.014              | 272.0             |
|               | 234.4  | −10.53 | 0.026              | −399.6            | –      | –      | –                  | –                 | 231.6 | −8.625 | 0.064              | −135.1            |
|               | 200.4  | 964.4  | 0.491              | 1963              | –      | –      | –                  | –                 | 200.0 | 98.65  | 0.525              | 187.9             |
|               |        |        |                    |                   |        |        |                    |                   |       |        |                    |                   |

**Table S3 XRFD signals exhibited from fibrous alignments of HYFNIF, RVFNIM and VIYKI**

Reflections measured manually are indicated by \*. E, equatorial; M, meridional; Rad, radially averaged.

| HYFNIF     |                               |      | RVFNIM     |                               |      | VIYKI      |                               |      |
|------------|-------------------------------|------|------------|-------------------------------|------|------------|-------------------------------|------|
| Signal (Å) | Normalized relative intensity | Axis | Signal (Å) | Normalized relative intensity | Axis | Signal (Å) | Normalized relative intensity | Axis |
| 38.98      | 0.95                          | E    |            |                               |      | 33.26*     | 0.47                          | E    |
| 19.22      | 0.70                          | E    | 18.72      | 0.73                          | E    | 20.04      | 0.29                          | E    |
| 12.37      | 0.78                          | E    | 10.79      | 0.87                          | E    | 11.81      | 0.38                          | E    |
| 10.03      | 0.63                          | E    | 8.31*      | 0.62                          | E    | 9.21       | 0.43                          | E    |
| 7.05       | 0.50                          | E    | 5.48       | 0.59                          | E    | 8.09*      | 0.34                          | E    |
| 5.23       | 0.60                          | E    |            |                               |      | 6.35       | 0.36                          | E    |
|            |                               |      |            |                               |      | 5.82*      | 0.34                          | E    |
|            |                               |      |            |                               |      | 5.12       | 0.28                          | E    |
|            |                               |      |            |                               |      | 3.25*      | 0.22                          | E    |
| 4.70       | 1.00                          | M    | 4.67       | 1.00                          | M    | 4.66       | 1.00                          | M    |
| 3.95       | 0.66                          | Rad  | 2.38       | 0.27                          | M    | 4.01       | 0.34                          | M    |
| 2.38       | 0.20                          | M    |            |                               |      | 3.72       | 0.34                          | Rad  |
|            |                               |      |            |                               |      | 2.38*      | 0.10                          | M    |

**Table S4 The diffraction signals and their respective indexing to the modelled unit cells predicted by Clearer**

[0 0 1] indices correspond to the fibre axis, all others are perpendicular to the fibre axis. The unit cell dimensions correspond to the peptides as follows:  $a = \beta$ -strand long axis,  $b = \beta$ -sheet spacing and  $c = \beta$ -sheet hydrogen bonding distance/fibre axis. The intensity of the 011 reflection is increased for RVFNIM and VIYKI due to  $\beta$ -sheet displacement along the fibre axis leading to higher resolution observed major meridional values.

| HYFNIF   |         |         |         |                           | RVFNIM |         |         |         |                           | VIYKI |         |         |         |                           |
|----------|---------|---------|---------|---------------------------|--------|---------|---------|---------|---------------------------|-------|---------|---------|---------|---------------------------|
|          | $a$ (Å) | $b$ (Å) | $c$ (Å) | $\alpha = \beta = \gamma$ |        | $a$ (Å) | $b$ (Å) | $c$ (Å) | $\alpha = \beta = \gamma$ |       | $a$ (Å) | $b$ (Å) | $c$ (Å) | $\alpha = \beta = \gamma$ |
|          | 41.72   | 12.60   | 4.70    | 90°                       |        | 18.80   | 21.94   | 4.78    | 90°                       |       | 34.94   | 19.01   | 4.76    | 90°                       |
| Indexing | h       | k       | l       | Calc                      | Obs    | h       | k       | l       | Calc                      | Obs   | h       | k       | l       | Calc                      |
| 38.98    | 1       | 0       | 0       | 41.72                     | 18.72  | 1       | 0       | 0       | 18.80                     | 33.26 | 1       | 0       | 0       | 34.95                     |
| 19.22    | 2       | 0       | 0       | 20.86                     | 10.79  | 0       | 2       | 0       | 10.97                     | 20.04 | 0       | 1       | 0       | 19.01                     |
| 12.37    | 0       | 1       | 0       | 12.60                     | 8.31   | 2       | 1       | 0       | 8.64                      | 11.81 | 3       | 0       | 0       | 11.65                     |
| 10.03    | 4       | 0       | 0       | 10.43                     | 5.48   | 0       | 4       | 0       | 5.49                      | 9.21  | 1       | 2       | 0       | 9.17                      |
| 7.05     | 6       | 0       | 0       | 6.95                      | 4.67   | 0       | 0       | 1       | 4.78                      | 8.09  | 4       | 1       | 0       | 7.94                      |
| 5.23     | 8       | 0       | 0       | 5.22                      | 4.67   | 0       | 1       | 1       | 4.67                      | 6.35  | 0       | 3       | 0       | 6.34                      |
| 4.70     | 0       | 0       | 1       | 4.70                      | 2.38   | 0       | 0       | 2       | 2.39                      | 5.82  | 6       | 0       | 0       | 5.82                      |
| 4.70     | 1       | 0       | 1       | 4.67                      |        |         |         |         |                           | 5.12  | 4       | 3       | 0       | 5.13                      |
| 3.95     | 6       | 0       | 1       | 3.89                      |        |         |         |         |                           | 3.25  | 8       | 4       | 0       | 3.22                      |
| 2.38     | 0       | 0       | 2       | 2.35                      |        |         |         |         |                           | 4.66  | 0       | 0       | 1       | 4.76                      |
|          |         |         |         |                           |        |         |         |         |                           | 4.66  | 0       | 1       | 1       | 4.62                      |
|          |         |         |         |                           |        |         |         |         |                           | 4.01  | 2       | 2       | 1       | 4.14                      |
|          |         |         |         |                           |        |         |         |         |                           | 2.38  | 0       | 0       | 2       | 2.38                      |

**Table S5 Quantitative RF comparisons of the simulated with the experimental fibre diffraction data**

| HYFNIF    | RF   | RVFNIM    | RF   | VIYKI     | RF   |
|-----------|------|-----------|------|-----------|------|
| Model I   | 0.37 | Class I   | 0.33 | Class I   | 0.41 |
| Model II  | 0.38 | Class II  | 0.35 | Class II  | 0.33 |
| Model III | 0.34 | Class III | 0.39 | Class III | 0.50 |
| Model IV  | 0.35 | Class IV  | 0.32 | Class IV  | 0.47 |

## REFERENCES

- Compton, L. A. and Johnson, W. C. (1986) Analysis of protein circular-dichroism spectra for secondary structure using a simple matrix multiplication. *Anal. Biochem.* **155**, 155–167
- Lees, J. G., Miles, A. J., Wien, F. and Wallace, B. A. (2006) A reference database for circular dichroism spectroscopy covering fold and secondary structure space. *Bioinformatics* **22**, 1955–1962
- Kim, Y. M. and Choi, B.-S. (2010) Structure and function of the regulatory HRDC domain from human Bloom syndrome protein. *Nucleic Acids Res.* **38**, 7764–7777
- Jones, D. T. (1999) Protein secondary structure prediction based on position-specific scoring matrices. *J. Mol. Biol.* **292**, 195–202
- Buchan, D. W. A., Ward, S. M., Lobley, A. E., Nugent, T. C. O., Bryson, K. and Jones, D. T. (2010) Protein annotation and modelling servers at University College London. *Nucleic Acids Res.* **38**, 563–568
- Sawaya, M. R., Sambashivan, S., Nelson, R., Ivanova, M. I., Sievers, S. A., Apostol, M. I., Thompson, M. J., Balbirnie, M., Wiltzius, J. J., McFarlane, H. T. et al. (2007) Atomic structures of amyloid cross- $\beta$  spines reveal varied steric zippers. *Nature* **447**, 453–457

Received 23 November 2012/17 December 2012; accepted 20 December 2012  
Published as BJ Immediate Publication 20 December 2012, doi:10.1042/BJ20121773
